# Supplementary material for: Epidemiologic patterns of biliary tract cancer in the United States: 2001–2015
Source: BMC Cancer. 2022 Nov 16;22:1178. doi: 10.1186/s12885-022-10286-z (PMC9670575; doi:10.1186/s12885-022-10286-z)
Supplement: Supplementary file 2 — Additional file 2. Original survival data for the Asian/Pacific Islander population with distant BTC and the SEER*Stat Survival Session. [file 12885_2022_10286_MOESM2_ESM.xlsx]

## Sheet: 12885_2022_10286_MOESM2_ESM
Additional File 2. Original survival data for the Asian/Pacific Islander population with distant BTC and the SEER*Stat Survival Session
Page type	BTC Primary Sites v2	Race-ethnicity group v3	SEER historic stage summary	Sex	Interval	Alive at Start	Died	Lost to Followup	Observed Survival (Interval)	Observed Survival (Cum)	Expected Survival (Interval)	Expected Survival (Cum)	Relative Survival (Interval)	Relative Survival (Cum)	Observed SE (Interval)	Observed SE (Cum)	Relative SE (Interval)	Relative SE (Cum)
Survival Life Page	All BTC sites	Asian, Pacific Islander	Distant	Male and female	< 1 mo	1516	184	21	0.878	0.878	0.999	0.999	0.879	0.879	0.008	0.008	0.008	0.008
Survival Life Page	All BTC sites	Asian, Pacific Islander	Distant	Male and female	1-<2 mo	1311	190	18	0.854	0.75	0.999	0.997	0.855	0.752	0.01	0.011	0.01	0.011
Survival Life Page	All BTC sites	Asian, Pacific Islander	Distant	Male and female	2-<3 mo	1103	149	20	0.864	0.647	0.999	0.996	0.865	0.65	0.01	0.012	0.01	0.012
Survival Life Page	All BTC sites	Asian, Pacific Islander	Distant	Male and female	3-<4 mo	934	117	8	0.874	0.566	0.999	0.995	0.875	0.569	0.011	0.013	0.011	0.013
Survival Life Page	All BTC sites	Asian, Pacific Islander	Distant	Male and female	4-<5 mo	809	106	6	0.868	0.492	0.999	0.994	0.869	0.495	0.012	0.013	0.012	0.013
Survival Life Page	All BTC sites	Asian, Pacific Islander	Distant	Male and female	5-<6 mo	697	72	11	0.896	0.44	0.999	0.993	0.897	0.443	0.012	0.013	0.012	0.013
Survival Life Page	All BTC sites	Asian, Pacific Islander	Distant	Male and female	6-<7 mo	614	75	10	0.877	0.386	0.999	0.992	0.878	0.389	0.013	0.013	0.013	0.013
Survival Life Page	All BTC sites	Asian, Pacific Islander	Distant	Male and female	7-<8 mo	529	59	2	0.888	0.343	0.999	0.991	0.889	0.346	0.014	0.013	0.014	0.013
Survival Life Page	All BTC sites	Asian, Pacific Islander	Distant	Male and female	8-<9 mo	468	39	8	0.916	0.314	0.999	0.99	0.917	0.317	0.013	0.012	0.013	0.012
Survival Life Page	All BTC sites	Asian, Pacific Islander	Distant	Male and female	9-<10 mo	421	42	6	0.9	0.283	0.999	0.99	0.9	0.286	0.015	0.012	0.015	0.012
Survival Life Page	All BTC sites	Asian, Pacific Islander	Distant	Male and female	10-<11 mo	373	36	3	0.903	0.255	0.999	0.989	0.904	0.258	0.015	0.012	0.015	0.012
Survival Life Page	All BTC sites	Asian, Pacific Islander	Distant	Male and female	11-<12 mo	334	29	5	0.913	0.233	0.999	0.988	0.913	0.236	0.016	0.011	0.016	0.012
Survival Life Page	All BTC sites	Asian, Pacific Islander	Distant	Male and female	12-<13 mo	300	17	1	0.943	0.22	0.999	0.987	0.944	0.223	0.013	0.011	0.013	0.011
Survival Life Page	All BTC sites	Asian, Pacific Islander	Distant	Male and female	13-<14 mo	282	26	1	0.908	0.199	0.999	0.986	0.908	0.202	0.017	0.011	0.017	0.011
Survival Life Page	All BTC sites	Asian, Pacific Islander	Distant	Male and female	14-<15 mo	255	27	0	0.894	0.178	0.999	0.985	0.895	0.181	0.019	0.01	0.019	0.011
Survival Life Page	All BTC sites	Asian, Pacific Islander	Distant	Male and female	15-<16 mo	228	16	3	0.929	0.166	0.999	0.985	0.93	0.168	0.017	0.01	0.017	0.01
Survival Life Page	All BTC sites	Asian, Pacific Islander	Distant	Male and female	16-<17 mo	209	16	5	0.923	0.153	0.999	0.984	0.923	0.155	0.019	0.01	0.019	0.01
Survival Life Page	All BTC sites	Asian, Pacific Islander	Distant	Male and female	17-<18 mo	188	12	2	0.936	0.143	0.999	0.983	0.937	0.145	0.018	0.01	0.018	0.01
Survival Life Page	All BTC sites	Asian, Pacific Islander	Distant	Male and female	18-<19 mo	174	11	2	0.936	0.134	0.999	0.983	0.937	0.136	0.019	0.009	0.019	0.01
Survival Life Page	All BTC sites	Asian, Pacific Islander	Distant	Male and female	19-<20 mo	161	11	1	0.931	0.125	0.999	0.982	0.932	0.127	0.02	0.009	0.02	0.009
Survival Life Page	All BTC sites	Asian, Pacific Islander	Distant	Male and female	20-<21 mo	149	8	2	0.946	0.118	0.999	0.981	0.947	0.12	0.019	0.009	0.019	0.009
Survival Life Page	All BTC sites	Asian, Pacific Islander	Distant	Male and female	21-<22 mo	139	10	1	0.928	0.109	0.999	0.98	0.929	0.112	0.022	0.009	0.022	0.009
Survival Life Page	All BTC sites	Asian, Pacific Islander	Distant	Male and female	22-<23 mo	128	6	2	0.953	0.104	0.999	0.98	0.953	0.107	0.019	0.009	0.019	0.009
Survival Life Page	All BTC sites	Asian, Pacific Islander	Distant	Male and female	23-<24 mo	120	13	1	0.891	0.093	0.999	0.979	0.892	0.095	0.028	0.008	0.029	0.008
Survival Life Page	All BTC sites	Asian, Pacific Islander	Distant	Male and female	24-<25 mo	106	5	0	0.953	0.089	0.999	0.978	0.954	0.091	0.021	0.008	0.021	0.008
Survival Life Page	All BTC sites	Asian, Pacific Islander	Distant	Male and female	25-<26 mo	101	8	3	0.92	0.081	0.999	0.977	0.92	0.083	0.027	0.008	0.027	0.008
Survival Life Page	All BTC sites	Asian, Pacific Islander	Distant	Male and female	26-<27 mo	90	4	3	0.955	0.078	0.999	0.976	0.956	0.08	0.022	0.008	0.022	0.008
Survival Life Page	All BTC sites	Asian, Pacific Islander	Distant	Male and female	27-<28 mo	83	2	1	0.976	0.076	0.999	0.975	0.977	0.078	0.017	0.008	0.017	0.008
Survival Life Page	All BTC sites	Asian, Pacific Islander	Distant	Male and female	28-<29 mo	80	4	0	0.95	0.072	0.999	0.974	0.951	0.074	0.024	0.007	0.024	0.008
Survival Life Page	All BTC sites	Asian, Pacific Islander	Distant	Male and female	29-<30 mo	76	3	2	0.96	0.069	0.999	0.973	0.961	0.071	0.023	0.007	0.023	0.008
Survival Life Page	All BTC sites	Asian, Pacific Islander	Distant	Male and female	30-<31 mo	71	6	0	0.915	0.063	0.999	0.972	0.916	0.065	0.033	0.007	0.033	0.007
Survival Life Page	All BTC sites	Asian, Pacific Islander	Distant	Male and female	31-<32 mo	65	1	0	0.985	0.062	0.999	0.971	0.986	0.064	0.015	0.007	0.015	0.007
Survival Life Page	All BTC sites	Asian, Pacific Islander	Distant	Male and female	32-<33 mo	64	3	3	0.952	0.059	0.999	0.97	0.953	0.061	0.027	0.007	0.027	0.007
Survival Life Page	All BTC sites	Asian, Pacific Islander	Distant	Male and female	33-<34 mo	58	4	1	0.93	0.055	0.999	0.969	0.931	0.057	0.034	0.007	0.034	0.007
Survival Life Page	All BTC sites	Asian, Pacific Islander	Distant	Male and female	34-<35 mo	53	1	2	0.981	0.054	0.999	0.968	0.982	0.056	0.019	0.007	0.019	0.007
Survival Life Page	All BTC sites	Asian, Pacific Islander	Distant	Male and female	35-<36 mo	50	3	1	0.939	0.051	0.999	0.967	0.94	0.053	0.034	0.007	0.034	0.007
Survival Life Page	All BTC sites	Asian, Pacific Islander	Distant	Male and female	36-<37 mo	46	1	3	0.978	0.05	0.999	0.966	0.979	0.052	0.022	0.006	0.022	0.007
Survival Life Page	All BTC sites	Asian, Pacific Islander	Distant	Male and female	37-<38 mo	42	1	0	0.976	0.049	0.999	0.965	0.977	0.05	0.024	0.006	0.024	0.007
Survival Life Page	All BTC sites	Asian, Pacific Islander	Distant	Male and female	38-<39 mo	41	2	0	0.951	0.046	0.999	0.964	0.952	0.048	0.034	0.006	0.034	0.007
Survival Life Page	All BTC sites	Asian, Pacific Islander	Distant	Male and female	39-<40 mo	39	0	2	1	0.046	0.999	0.963	1	0.048	0	0.006	0	0.007
Survival Life Page	All BTC sites	Asian, Pacific Islander	Distant	Male and female	40-<41 mo	37	0	1	1	0.046	0.999	0.962	1	0.048	0	0.006	0	0.007
Survival Life Page	All BTC sites	Asian, Pacific Islander	Distant	Male and female	41-<42 mo	36	0	1	1	0.046	0.999	0.961	1	0.048	0	0.006	0	0.007
Survival Life Page	All BTC sites	Asian, Pacific Islander	Distant	Male and female	42-<43 mo	35	2	0	0.943	0.044	0.999	0.959	0.944	0.045	0.039	0.006	0.039	0.007
Survival Life Page	All BTC sites	Asian, Pacific Islander	Distant	Male and female	43-<44 mo	33	1	0	0.97	0.042	0.999	0.958	0.971	0.044	0.03	0.006	0.03	0.006
Survival Life Page	All BTC sites	Asian, Pacific Islander	Distant	Male and female	44-<45 mo	32	1	1	0.968	0.041	0.999	0.957	0.969	0.043	0.031	0.006	0.031	0.006
Survival Life Page	All BTC sites	Asian, Pacific Islander	Distant	Male and female	45-<46 mo	30	2	1	0.932	0.038	0.999	0.956	0.933	0.04	0.046	0.006	0.046	0.006
Survival Life Page	All BTC sites	Asian, Pacific Islander	Distant	Male and female	46-<47 mo	27	0	0	1	0.038	0.999	0.955	1	0.04	0	0.006	0	0.006
Survival Life Page	All BTC sites	Asian, Pacific Islander	Distant	Male and female	47-<48 mo	27	0	1	1	0.038	0.999	0.954	1	0.04	0	0.006	0	0.006
Survival Life Page	All BTC sites	Asian, Pacific Islander	Distant	Male and female	48-<49 mo	26	1	0	0.962	0.037	0.999	0.953	0.963	0.038	0.038	0.006	0.038	0.006
Survival Life Page	All BTC sites	Asian, Pacific Islander	Distant	Male and female	49-<50 mo	25	0	0	1	0.037	0.999	0.951	1	0.038	0	0.006	0	0.006
Survival Life Page	All BTC sites	Asian, Pacific Islander	Distant	Male and female	50-<51 mo	25	0	1	1	0.037	0.999	0.95	1	0.038	0	0.006	0	0.006
Survival Life Page	All BTC sites	Asian, Pacific Islander	Distant	Male and female	51-<52 mo	24	0	1	1	0.037	0.999	0.949	1	0.038	0	0.006	0	0.006
Survival Life Page	All BTC sites	Asian, Pacific Islander	Distant	Male and female	52-<53 mo	23	2	1	0.911	0.033	0.999	0.947	0.912	0.035	0.06	0.006	0.06	0.006
Survival Life Page	All BTC sites	Asian, Pacific Islander	Distant	Male and female	53-<54 mo	20	0	1	1	0.033	0.998	0.946	1	0.035	0	0.006	0	0.006
Survival Life Page	All BTC sites	Asian, Pacific Islander	Distant	Male and female	54-<55 mo	19	0	1	1	0.033	0.998	0.944	1	0.035	0	0.006	0	0.006
Survival Life Page	All BTC sites	Asian, Pacific Islander	Distant	Male and female	55-<56 mo	18	1	0	0.944	0.032	0.998	0.943	0.946	0.033	0.054	0.006	0.054	0.006
Survival Life Page	All BTC sites	Asian, Pacific Islander	Distant	Male and female	56-<57 mo	17	1	0	0.941	0.03	0.998	0.941	0.943	0.032	0.057	0.006	0.057	0.006
Survival Life Page	All BTC sites	Asian, Pacific Islander	Distant	Male and female	57-<58 mo	16	1	1	0.935	0.028	0.998	0.939	0.937	0.03	0.062	0.006	0.063	0.006
Survival Life Page	All BTC sites	Asian, Pacific Islander	Distant	Male and female	58-<59 mo	14	0	0	1	0.028	0.998	0.938	1	0.03	0	0.006	0	0.006
Survival Life Page	All BTC sites	Asian, Pacific Islander	Distant	Male and female	59-<60 mo	14	0	0	1	0.028	0.999	0.937	1	0.03	0	0.006	0	0.006
Total number of patients lost to follow-up								171
Percentage of lost to follow-up = (# of lost to follow-up/# patients in the beginning)								11.28
